# Supplementary material for: Yoghurt Intake and Gastric Cancer: A Pooled Analysis of 16 Studies of the StoP Consortium
Source: MDPI journal article supplement (doi:10.3390/nu15081877), 2023-04-13
Supplement: s1 [file s1]

**Supplementary Table S1.** Characteristics of StoP Consortium Studies.

| Study Name                 | Country              | Reference                              | Study Period | Cases (n) | Control (n) | Control Type                                    | Yoghurt Data                                        |
|----------------------------|----------------------|----------------------------------------|--------------|-----------|-------------|-------------------------------------------------|-----------------------------------------------------|
| Milan, Italy [20]          | Milan, Italy         | Lucenteforte et al., 2008              | 1997–2007    | 230       | 547         | Hospital-based                                  | 1 portion = 125 g; weekly intake                    |
| Multicenter, Italy [21]    | 4 areas, Italy       | Buiatti et al., 1989                   | 1985–1987    | 1016      | 1159        | Population-based                                | Weekly intake in the previous 2/3 years             |
| Athens, Greece [25]        | Greece               | Lagiou et al., 2004                    | 1981–1984    | 110       | 100         | Hospital-based                                  | Weekly intake                                       |
| Moscow, Russia [27]        | Russia               | Zaridze et al., 1999                   | 1996–1997    | 450       | 611         | Hospital-based                                  | 1 portion = 200 g; weekly intake                    |
| New York, USA [31]         | USA                  | Zhang et al. 1999                      | 1992–1994    | 132       | 132         | Hospital-based                                  | Flavored yoghurt; 1 cup; frequency of consumption   |
| Porto, Portugal [22]       | Portugal             | Lunet et al., 2007                     | 1999–2006    | 692       | 1667        | Population-based                                | 1 portion = 125 g; frequency of consumption         |
| 10 provinces, Spain [23]   | Spain                | Castano-Vinyals et al., 2015           | 2008–2012    | 441       | 3440        | Population-based                                | Whole and skimmed yoghurt; frequency of consumption |
| Valenica, Spain [24]       | Spain                | Santibanez et al., 2012                | 1995–1999    | 401       | 455         | Hospital-based                                  | 1 portion = 125 g; frequency of consumption         |
| Mexico City 1, Mexico [28] | Mexico               | Hernandez -Ramirez et al., 2009        | 2004–2005    | 248       | 478         | Population-based                                | NA                                                  |
| Mexico City 2, Mexico [29] | Mexico               | Lopez-Carrillo et al., 1994            | 1989–1990    | 220       | 752         | Population-based                                | NA                                                  |
| 3 areas, Mexico [30]       | Mexico               | Lopez-Carrillo et al., 2003            | 1994–1996    | 234       | 468         | Hospital-based                                  | NA                                                  |
| Nagano, Japan [26]         | Japan                | Machida-Montani et al., 2004           | 1998–2002    | 153       | 303         | Hospital-based                                  | Frequency of consumption                            |
| Greece [17]                | Greece               | Psaltopoulou et al., 2008              | 1994–1999    | 82        | 410         | Cohort, nested case-control (EPIC-GREECE study) | NA                                                  |
| Finland [18]               | Finland              | The ATBC Cancer Prevention Study Group | 1985–1988    | 486       | 972         | Cohort, nested case-control (ATBC study)        | NA                                                  |
| 6 States, USA [32]         | USA                  | Schatzkin et al., 2001                 | 1995–1996    | 1583      | 3331        | Cohort, nested case-control (AARP study)        | Frequency of consumption                            |
| Brazil [33]                | Brazil, multicentric | Peres SV et al., 2022                  | 2016–2019    | 368       | 738         | Hospital-based                                  | Frequency of consumption                            |

Notes: ATBC = Alpha-Tocopherol, Beta-Carotene.

**Supplementary Table S2.** Results of the analysis stratified by sex.

| Sex Subgroup    | Yoghurt Intake OR (95% CI) |                  |                  |                  |                  |
|-----------------|----------------------------|------------------|------------------|------------------|------------------|
|                 | Q1                         | Q2               | Q3               | Q4               | Q5               |
| Male            | Ref                        | 0.89 (0.79–1.01) | 0.89 (0.75–1.04) | 0.86 (0.72–1.02) | 1.08 (0.91–1.28) |
| Female          | Ref                        | 0.82 (0.69–0.98) | 1.03 (0.84–1.25) | 0.89 (0.73–1.09) | 1.15 (0.95–1.40) |
| Continuous      |                            |                  |                  |                  |                  |
| Male            |                            |                  | 0.99 (0.96–1.03) |                  |                  |
| Female          |                            |                  | 1.02 (0.98–1.07) |                  |                  |
| P heterogeneity |                            |                  | 0.3              |                  |                  |
